# Supplementary material for: Synthesis, polymorphism, and shape complementarity-induced co-crystallization of hexanuclear Co(ii) clusters capped by a flexible heteroligand shell
Source: Royal Society of Chemistry journal article supplement (doi:10.1039/d4dt00261j), 2024-01-01
Supplement: d4dt00261j1.pdf [file d4dt00261j1.pdf]

## Supporting Information

Synthesis, polymorphism, and shape complementarity-induced co-crystallization of hexanuclear Co(II) clusters capped by a flexible heteroligand shell

*Michał Terlecki*\*<sup>[a]</sup>, *Arkadiusz Kornowicz*,<sup>[b]</sup> *Kornel Sacharczuk*,<sup>[a]</sup> *Iwona Justyniak*,<sup>[b]</sup> and *Janusz Lewiński*\*<sup>[a,b]</sup>

<sup>[a]</sup>Faculty of Chemistry, Warsaw University of Technology, Noakowsiego 3, 00-664 Warsaw, Poland

<sup>[b]</sup>Institute of Physical Chemistry, Polish Academy of Sciences, Kasprzaka 44/52, 01-224 Warsaw, Poland

## Table of contents

|                                      |     |
|--------------------------------------|-----|
| Cobalt(II) acetate purification..... | S3  |
| TGA Analysis .....                   | S3  |
| PXRD Analysis .....                  | S5  |
| X-Ray crystallographic data.....     | S7  |
| Coordination geometry analysis.....  | S17 |
| Hirshfeld Surface analysis: .....    | S18 |

## Cobalt(II) acetate purification

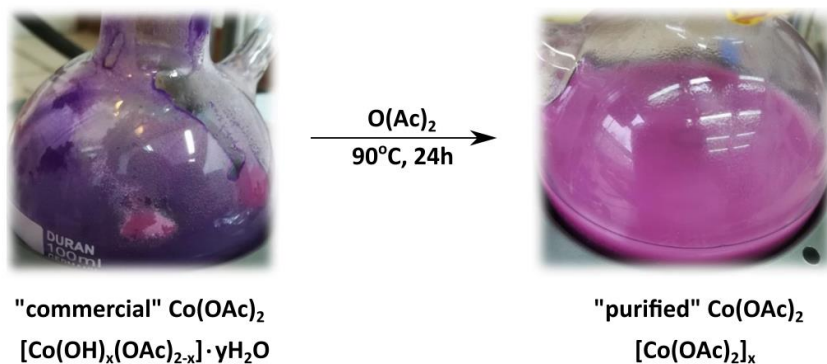

**Figure S1.** Color change during purification of commercial cobalt(II) acetate.

## TGA Analysis

According to the literature thermal decomposition of  $\text{Co}(\text{OAc})_2 \cdot 4\text{H}_2\text{O}$  is a complicated multi-step process.<sup>1</sup> The mass decrease to  $150^\circ\text{C}$  is associated with dehydration and partial elimination of acetic acid with the formation of Co-OH species. Then above  $260^\circ\text{C}$  there is further elimination of acetic acid leading to deprotonation of OH groups. Finally, at about  $350^\circ\text{C}$  decomposition of organic parts occurs leading to cobalt oxides. A similar multi-step decomposition is observed in commercial and thermally treated  $\text{Co}(\text{OAc})_2$  (Figure S2 and S3), with a mass decrease below  $150^\circ\text{C}$  of about 10% and 3%, respectively. These values quite well reflect the water content in estimated (based on elemental analysis) formulas for both reagents:  $[\text{Co}(\text{OH})_{0.34}(\text{OAc})_{1.66}] \cdot 0.70\text{H}_2\text{O}$  (calc. water cont. 7.2%) and  $[\text{Co}(\text{OH})_{0.28}(\text{OAc})_{1.72}] \cdot 0.12\text{H}_2\text{O}$  (calc. water cont. 1.3%), respectively (note, that experimental mass decrease is greater likely due to partial elimination of acetic acid). In turn, the TGA curve for purified  $\text{Co}(\text{OAc})_2$  shows only a three-step decomposition above  $240^\circ\text{C}$  (Figure S3), indicating the absence of water or OH groups in the structure.

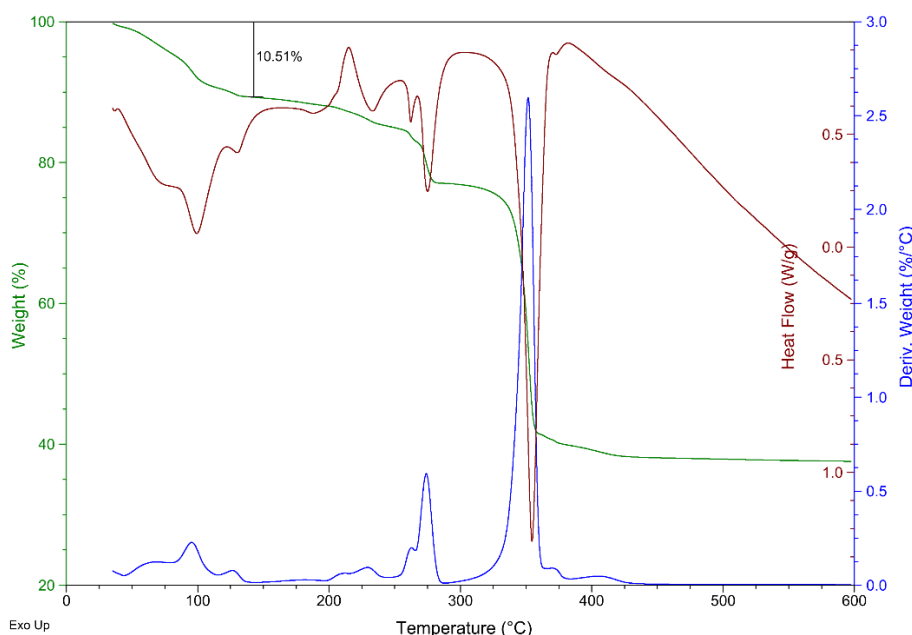

**Figure S2.** TGA-DSC plot for commercial cobalt(II) acetate.

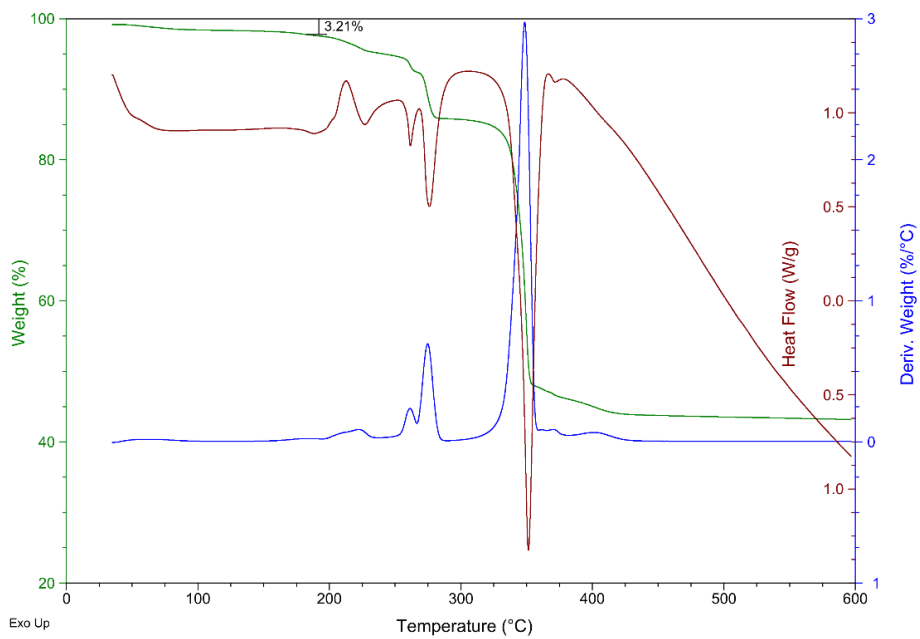

**Figure S3.** TGA-DSC plot for thermally treated cobalt(II) acetate.

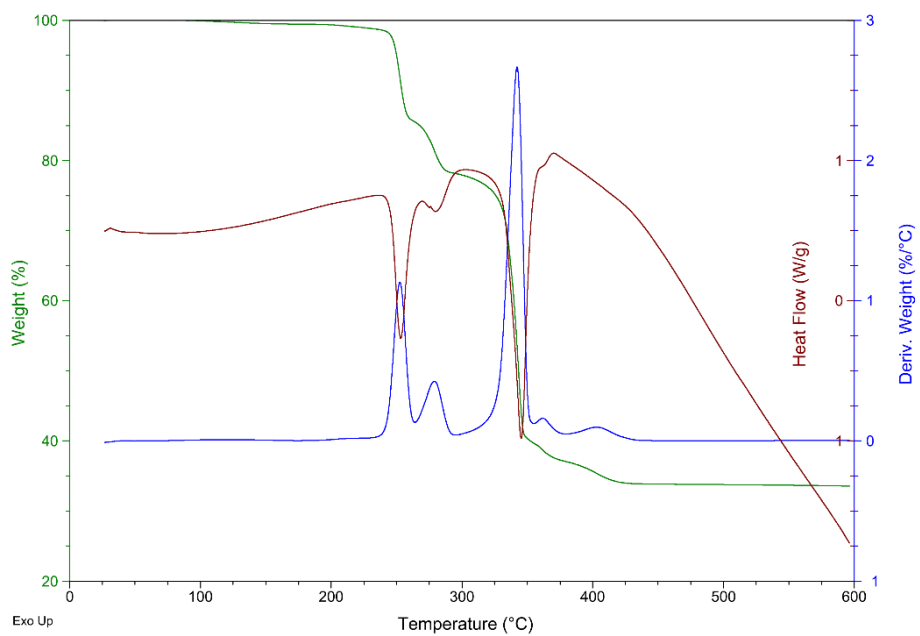

**Figure S4.** TGA-DSC plot for purified cobalt(II) acetate.

## PXRD Analysis

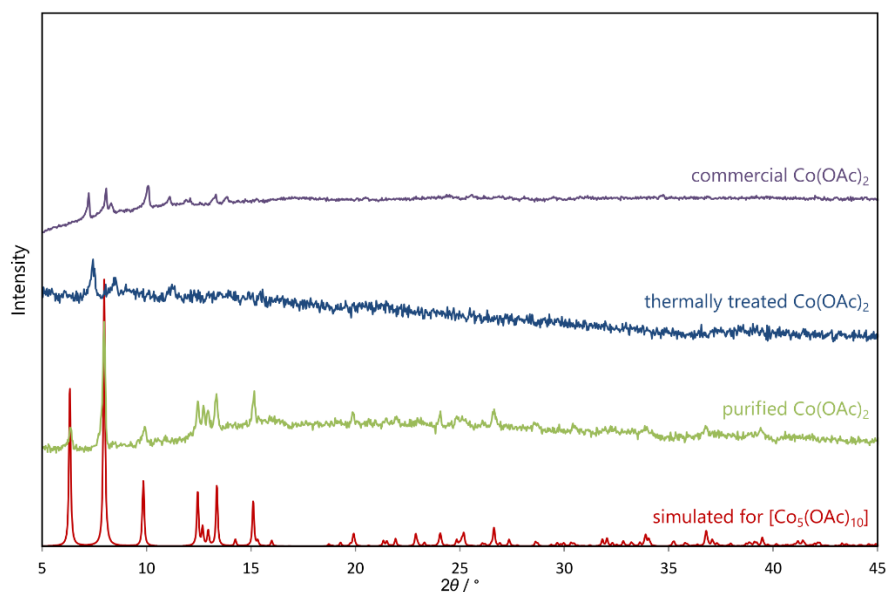

**Figure S5.** PXRD patterns simulated for  $[\text{Co}_5(\text{OAc})_{10}]^2$  and measured for commercial, thermally treated, and purified  $\text{Co(OAc)}_2$  reagents.

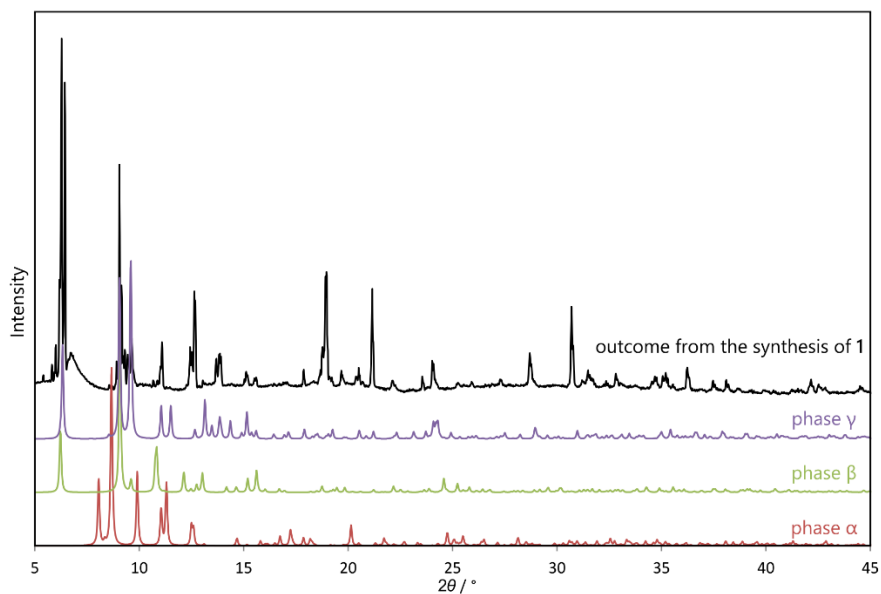

**Figure S6.** PXRD patterns simulated for phases  $\alpha$ ,  $\beta$ , and  $\gamma$  of complex **1** and measured for the outcome from the synthesis of **1**.

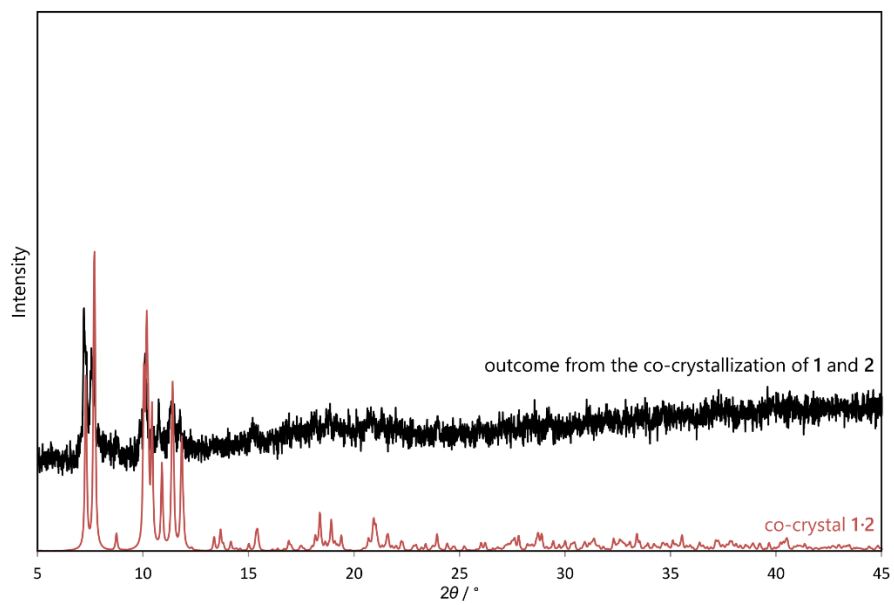

**Figure S7.** PXRD patterns simulated for co-crystal **1·2** and measured for for the outcome from the co-crystallization of **1** and **2**.

## X-Ray crystallographic data

**Table S1.** Crystal data and structure refinement for **1(α)**

|                                   |                                                                                |                                          |
|-----------------------------------|--------------------------------------------------------------------------------|------------------------------------------|
| Empirical formula                 | C <sub>44</sub> H <sub>86</sub> Co <sub>6</sub> N <sub>6</sub> O <sub>16</sub> |                                          |
| Formula weight                    | 1308.76                                                                        |                                          |
| Temperature                       | 100(2) K                                                                       |                                          |
| Wavelength                        | 0.71073 Å                                                                      |                                          |
| Crystal system                    | Monoclinic                                                                     |                                          |
| Space group                       | P 21/n                                                                         |                                          |
| Unit cell dimensions              | a = 11.4060(4) Å<br>b = 11.6220(4) Å<br>c = 21.8380(8) Å                       | a = 90°.<br>b = 104.348(2)°.<br>g = 90°. |
| Volume                            | 2804.56(17) Å <sup>3</sup>                                                     |                                          |
| Z                                 | 2                                                                              |                                          |
| Density (calculated)              | 1.550 Mg/m <sup>3</sup>                                                        |                                          |
| Absorption coefficient            | 1.801 mm <sup>-1</sup>                                                         |                                          |
| F(000)                            | 1364                                                                           |                                          |
| Theta range for data collection   | 2.553 to 27.353 °                                                              |                                          |
| Index ranges                      | -14<=h<=14, -15<=k<=14, -26<=l<=28                                             |                                          |
| Reflections collected             | 10537                                                                          |                                          |
| Independent reflections           | 5775 [R(int) = 0.0387]                                                         |                                          |
| Completeness to theta = 25.000°   | 93.9 %                                                                         |                                          |
| Refinement method                 | Full-matrix least-squares on F <sup>2</sup>                                    |                                          |
| Data / restraints / parameters    | 5775 / 0 / 327                                                                 |                                          |
| Goodness-of-fit on F <sup>2</sup> | 1.104                                                                          |                                          |
| Final R indices [I>2sigma(I)]     | R1 = 0.0367, wR2 = 0.0794                                                      |                                          |
| R indices (all data)              | R1 = 0.0434, wR2 = 0.0823                                                      |                                          |
| Largest diff. peak and hole       | 0.402 and -0.493 e.Å <sup>-3</sup>                                             |                                          |

<sup>a</sup>  $R1 = \sum ||Fo| - |Fc|| / \sum |Fo|$ . <sup>b</sup>  $wR2 = [\sum w(Fo^2 - Fc^2)^2 / \sum w(Fo^2)^2]^{1/2}$

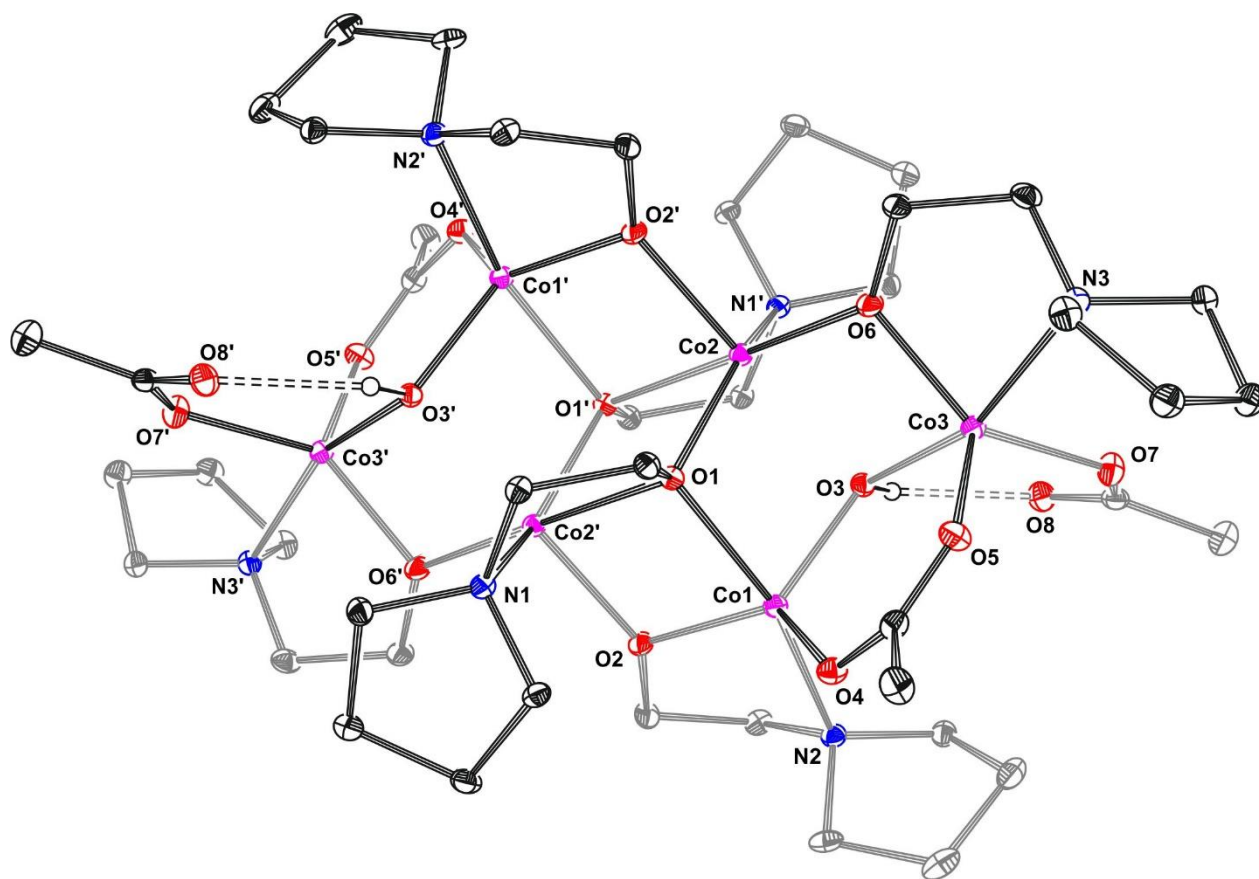

**Figure. S8.** Molecular structure of **1(a)** with thermal ellipsoids set at 30% probability. Hydrogen atoms have been omitted for clarity. Symmetry transformations used to generate equivalent atoms:  $(-x+1, -y+1, -z+1)$ .



**Table S2.** Crystal data and structure refinement for **1(β)**

|                                   |                                                                                |                 |
|-----------------------------------|--------------------------------------------------------------------------------|-----------------|
| Empirical formula                 | C <sub>44</sub> H <sub>86</sub> Co <sub>6</sub> N <sub>6</sub> O <sub>16</sub> |                 |
| Formula weight                    | 1308.76                                                                        |                 |
| Temperature                       | 100(2) K                                                                       |                 |
| Wavelength                        | 0.71073 Å                                                                      |                 |
| Crystal system                    | Monoclinic                                                                     |                 |
| Space group                       | P 21/c                                                                         |                 |
| Unit cell dimensions              | a = 14.2057(4) Å                                                               | a = 90°.        |
|                                   | b = 12.0883(4) Å                                                               | b = 93.260(3)°. |
|                                   | c = 16.4530(7) Å                                                               | g = 90°.        |
| Volume                            | 2820.78(17) Å <sup>3</sup>                                                     |                 |
| Z                                 | 2                                                                              |                 |
| Density (calculated)              | 1.541 Mg/m <sup>3</sup>                                                        |                 |
| Absorption coefficient            | 1.791 mm <sup>-1</sup>                                                         |                 |
| F(000)                            | 1364                                                                           |                 |
| Theta range for data collection   | 2.872 to 26.995°.                                                              |                 |
| Index ranges                      | -18<=h<=17, -13<=k<=15, -21<=l<=20                                             |                 |
| Reflections collected             | 13583                                                                          |                 |
| Independent reflections           | 6056 [R(int) = 0.0543]                                                         |                 |
| Completeness to theta = 25.242°   | 99.8 %                                                                         |                 |
| Refinement method                 | Full-matrix least-squares on F <sup>2</sup>                                    |                 |
| Data / restraints / parameters    | 6056 / 0 / 327                                                                 |                 |
| Goodness-of-fit on F <sup>2</sup> | 1.109                                                                          |                 |
| Final R indices [I>2sigma(I)]     | R1 = 0.0425, wR2 = 0.1003                                                      |                 |
| R indices (all data)              | R1 = 0.0585, wR2 = 0.1130                                                      |                 |
| Largest diff. peak and hole       | 0.693 and -0.584 e.Å <sup>-3</sup>                                             |                 |

---

<sup>a</sup>  $R1 = \sum ||Fo| - |Fc|| / \sum |Fo|$ . <sup>b</sup>  $wR2 = [\sum w(Fo^2 - Fc^2)^2 / \sum w(Fo^2)^2]^{1/2}$

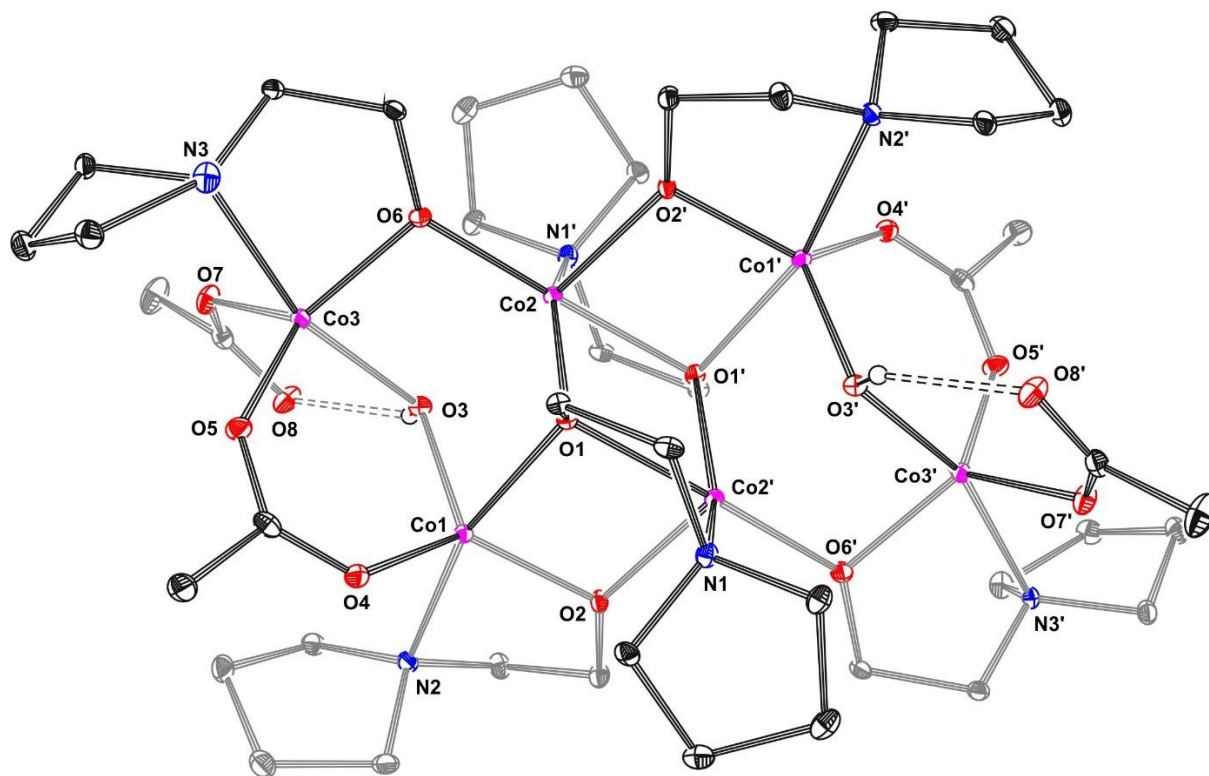

**Figure. S9.** Molecular structure of **1(β)** with thermal ellipsoids set at 30% probability. Hydrogen atoms have been omitted for clarity. Symmetry transformations used to generate equivalent atoms:  $(-x+1, -y+1, -z+1)$ .

**Table S3.** Crystal data and structure refinement for **1(y)**

|                                   |                                                                                |          |
|-----------------------------------|--------------------------------------------------------------------------------|----------|
| Empirical formula                 | C <sub>44</sub> H <sub>86</sub> Co <sub>6</sub> N <sub>6</sub> O <sub>16</sub> |          |
| Formula weight                    | 1308.76                                                                        |          |
| Temperature                       | 100(2) K                                                                       |          |
| Wavelength                        | 0.71073 Å                                                                      |          |
| Crystal system                    | Orthorhombic                                                                   |          |
| Space group                       | P c a 21                                                                       |          |
| Unit cell dimensions              | a = 12.6327(3) Å                                                               | a = 90°. |
|                                   | b = 15.3660(3) Å                                                               | b = 90°. |
|                                   | c = 27.9274(5) Å                                                               | g = 90°. |
| Volume                            | 5421.10(19) Å <sup>3</sup>                                                     |          |
| Z                                 | 4                                                                              |          |
| Density (calculated)              | 1.604 Mg/m <sup>3</sup>                                                        |          |
| Absorption coefficient            | 1.864 mm <sup>-1</sup>                                                         |          |
| F(000)                            | 2728                                                                           |          |
| Theta range for data collection   | 3.024 to 26.999 °.                                                             |          |
| Index ranges                      | -15<=h<=9, -19<=k<=14, -34<=l<=35                                              |          |
| Reflections collected             | 19815                                                                          |          |
| Independent reflections           | 10589 [R(int) = 0.0372]                                                        |          |
| Completeness to theta = 25.242°   | 99.8 %                                                                         |          |
| Absorption correction             | Semi-empirical from equivalents                                                |          |
| Refinement method                 | Full-matrix least-squares on F <sup>2</sup>                                    |          |
| Data / restraints / parameters    | 10589 / 3 / 662                                                                |          |
| Goodness-of-fit on F <sup>2</sup> | 1.045                                                                          |          |
| Final R indices [I>2sigma(I)]     | R1 = 0.0427, wR2 = 0.0862                                                      |          |
| R indices (all data)              | R1 = 0.0539, wR2 = 0.0940                                                      |          |
| Largest diff. peak and hole       | 1.317 and -0.471 e.Å <sup>-3</sup>                                             |          |

---

<sup>a</sup> R1 =  $\sum ||F_o| - |F_c|| / \sum |F_o|$ . <sup>b</sup> wR2 =  $[\sum w(F_o^2 - F_c^2)^2 / \sum w(F_o^2)^2]^{1/2}$

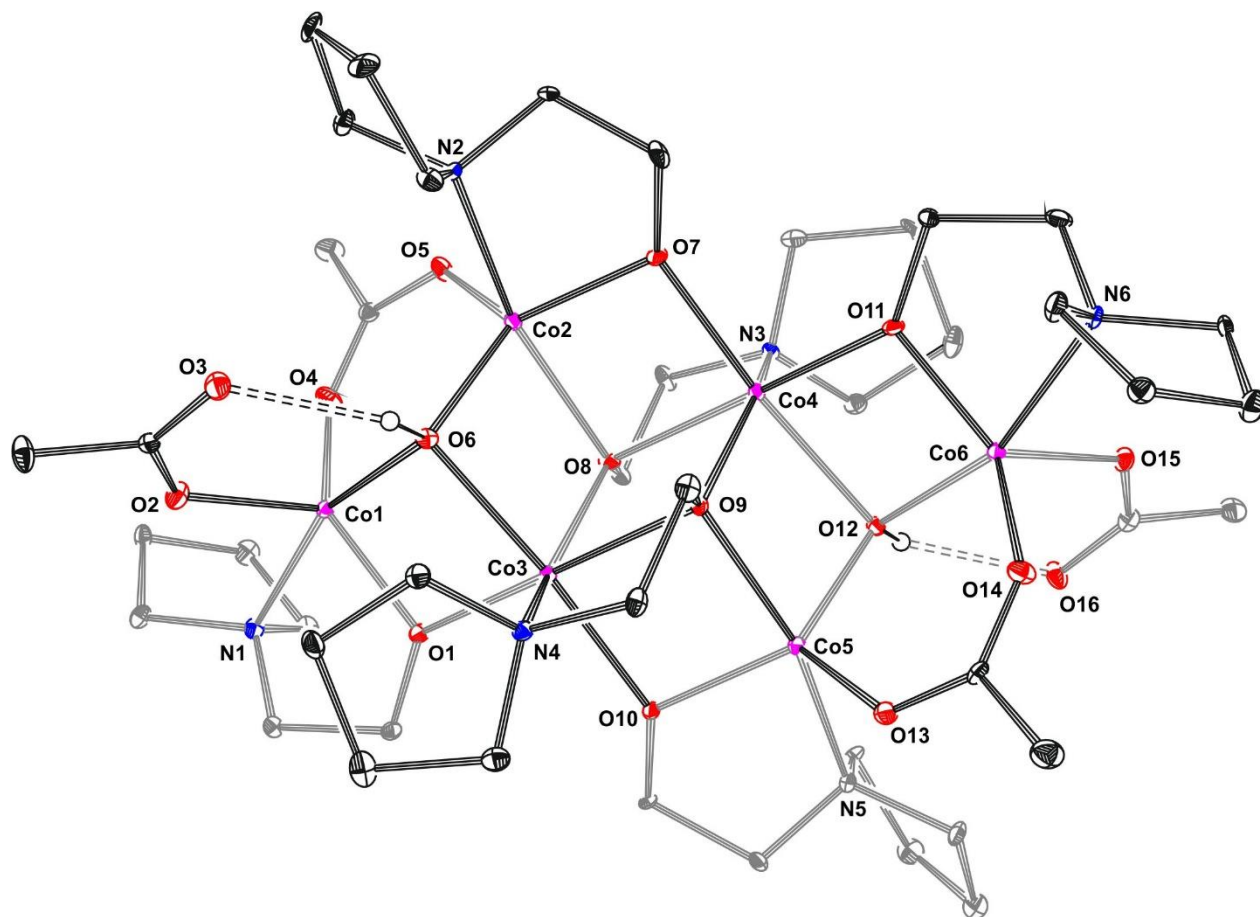

**Figure. S10.** Molecular structure of **1(γ)** with thermal ellipsoids set at 30% probability. Hydrogen atoms have been omitted for clarity.

**Table S4.** Crystal data and structure refinement for **2**

|                                   |                                                                                |                 |
|-----------------------------------|--------------------------------------------------------------------------------|-----------------|
| Empirical formula                 | C <sub>48</sub> H <sub>90</sub> Co <sub>6</sub> N <sub>6</sub> O <sub>18</sub> |                 |
| Formula weight                    | 1392.83                                                                        |                 |
| Temperature                       | 100(2) K                                                                       |                 |
| Wavelength                        | 0.71073 Å                                                                      |                 |
| Crystal system                    | Monoclinic                                                                     |                 |
| Space group                       | P 21/c                                                                         |                 |
| Unit cell dimensions              | a = 12.2702(2) Å                                                               | a = 90°.        |
|                                   | b = 13.7088(3) Å                                                               | b = 91.439(2)°. |
|                                   | c = 17.3126(3) Å                                                               | g = 90°.        |
| Volume                            | 2911.23(9) Å <sup>3</sup>                                                      |                 |
| Z                                 | 2                                                                              |                 |
| Density (calculated)              | 1.589 Mg/m <sup>3</sup>                                                        |                 |
| Absorption coefficient            | 1.743 mm <sup>-1</sup>                                                         |                 |
| F(000)                            | 1452                                                                           |                 |
| Theta range for data collection   | 2.972 to 29.214°.                                                              |                 |
| Index ranges                      | -16<=h<=16, -18<=k<=18, -23<=l<=20                                             |                 |
| Reflections collected             | 15030                                                                          |                 |
| Independent reflections           | 6780 [R(int) = 0.0234]                                                         |                 |
| Completeness to theta = 25.242°   | 99.6 %                                                                         |                 |
| Absorption correction             | Semi-empirical from equivalents                                                |                 |
| Refinement method                 | Full-matrix least-squares on F <sup>2</sup>                                    |                 |
| Data / restraints / parameters    | 6780 / 6 / 365                                                                 |                 |
| Goodness-of-fit on F <sup>2</sup> | 1.081                                                                          |                 |
| Final R indices [I>2sigma(I)]     | R1 = 0.0366, wR2 = 0.0831                                                      |                 |
| R indices (all data)              | R1 = 0.0436, wR2 = 0.0861                                                      |                 |
| Largest diff. peak and hole       | 0.792 and -0.436 e.Å <sup>-3</sup>                                             |                 |

---

<sup>a</sup>  $R1 = \sum ||Fo| - |Fc|| / \sum |Fo|$ . <sup>b</sup>  $wR2 = [\sum w(Fo^2 - Fc^2)^2 / \sum w(Fo^2)^2]^{1/2}$

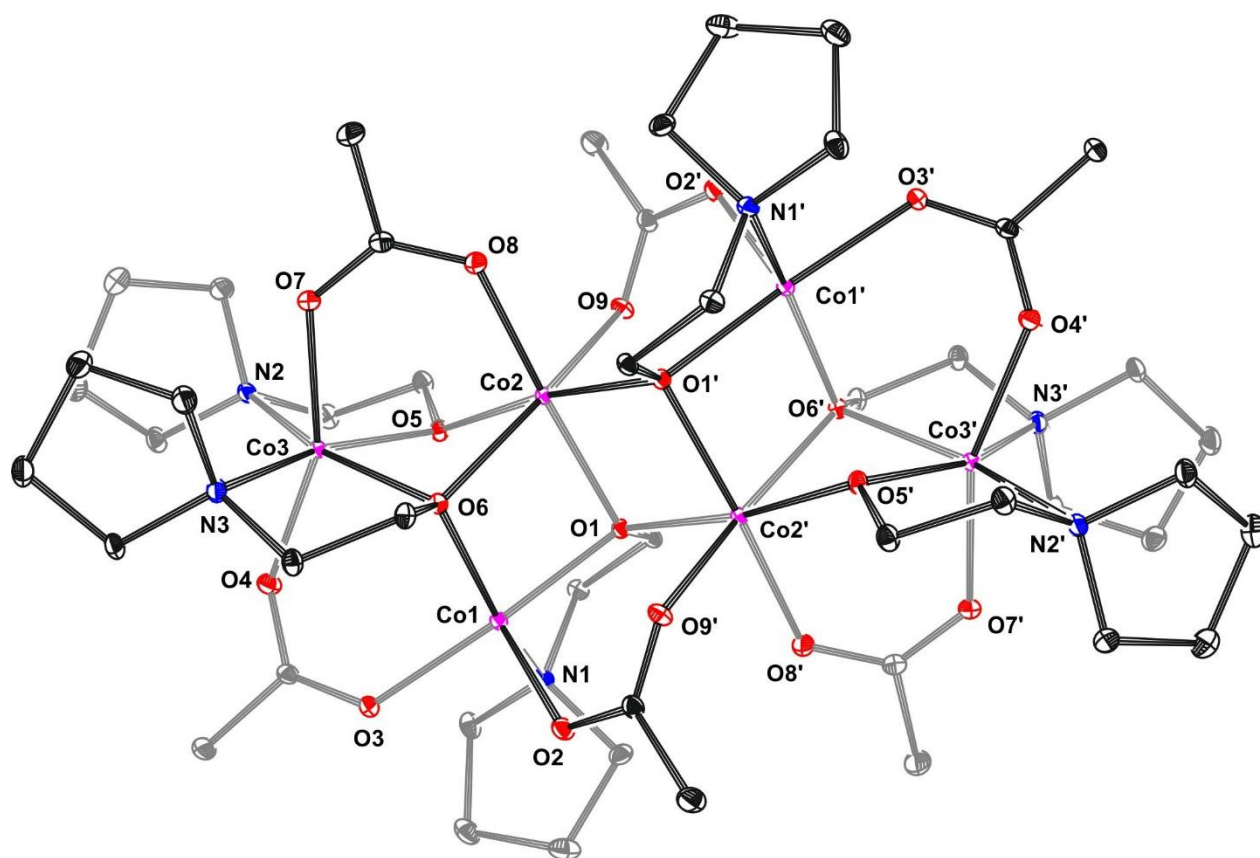

**Figure. S11.** Molecular structure of **2** with thermal ellipsoids set at 30% probability. Hydrogen atoms have been omitted for clarity. Symmetry transformations used to generate equivalent atoms:  $(-x, -y, -z)$ .

**Table S5.** Crystal data and structure refinement for **1-2**

|                                   |                                                                                   |                 |
|-----------------------------------|-----------------------------------------------------------------------------------|-----------------|
| Empirical formula                 | C <sub>92</sub> H <sub>176</sub> Co <sub>12</sub> N <sub>12</sub> O <sub>34</sub> |                 |
| Formula weight                    | 2701.60                                                                           |                 |
| Temperature                       | 100(2) K                                                                          |                 |
| Wavelength                        | 0.71073 Å                                                                         |                 |
| Crystal system                    | Triclinic                                                                         |                 |
| Space group                       | P -1                                                                              |                 |
| Unit cell dimensions              | a = 10.1181(4) Å                                                                  | a = 93.061(3)°. |
|                                   | b = 16.2501(6) Å                                                                  | b = 91.191(3)°. |
|                                   | c = 17.1906(7) Å                                                                  | g = 91.462(3)°. |
| Volume                            | 2820.83(19) Å <sup>3</sup>                                                        |                 |
| Z                                 | 1                                                                                 |                 |
| Density (calculated)              | 1.590 Mg/m <sup>3</sup>                                                           |                 |
| Absorption coefficient            | 1.795 mm <sup>-1</sup>                                                            |                 |
| F(000)                            | 1408                                                                              |                 |
| Theta range for data collection   | 3.079 to 27.000°.                                                                 |                 |
| Index ranges                      | -12<=h<=12, -20<=k<=18, -21<=l<=21                                                |                 |
| Reflections collected             | 22897                                                                             |                 |
| Independent reflections           | 12114 [R(int) = 0.0280]                                                           |                 |
| Completeness to theta = 25.242°   | 99.8 %                                                                            |                 |
| Absorption correction             | Semi-empirical from equivalents                                                   |                 |
| Refinement method                 | Full-matrix least-squares on F <sup>2</sup>                                       |                 |
| Data / restraints / parameters    | 12114 / 42 / 710                                                                  |                 |
| Goodness-of-fit on F <sup>2</sup> | 1.040                                                                             |                 |
| Final R indices [I>2sigma(I)]     | R1 = 0.0321, wR2 = 0.0682                                                         |                 |
| R indices (all data)              | R1 = 0.0406, wR2 = 0.0736                                                         |                 |
| Largest diff. peak and hole       | 0.536 and -0.559 e.Å <sup>-3</sup>                                                |                 |

---

<sup>a</sup>  $R1 = \sum ||Fo| - |Fc|| / \sum |Fo|$ . <sup>b</sup>  $wR2 = [\sum w(Fo^2 - Fc^2)^2 / \sum w(Fo^2)^2]^{1/2}$

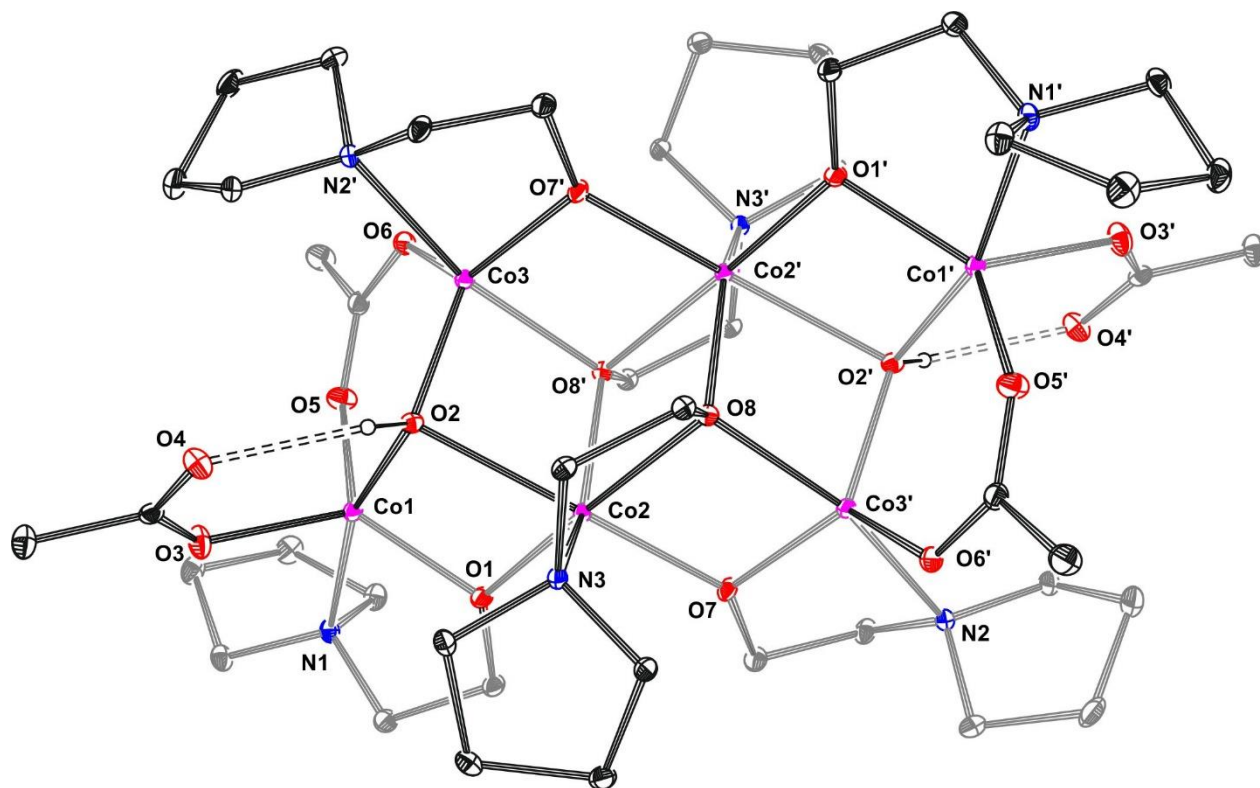

**Figure. S12.** Molecular structure of **1-2** with thermal ellipsoids set at 30% probability. Hydrogen atoms have been omitted for clarity. Symmetry transformations used to generate equivalent atoms:  $(-x, -y+2, -z)$ ,  $(-x+1, -y+1, -z+1)$ .



## Coordination geometry analysis

Analysis of the coordination sphere geometry of Co(II) centers in the presented structures was conducted employing the continuous shape measurement (CShM)<sup>3</sup> (lower the CShM values indicate better fit to given geometry) using SHAPE software.<sup>4</sup> The results are presented in Table S6 and S7.

**Table S6.** CShM parameters for five-coordinated Co(II) centers in crystal structures of **1**, **2** and **1·2**

| Geometry                                         | CShM          |              |              |              |               |              |              |              |
|--------------------------------------------------|---------------|--------------|--------------|--------------|---------------|--------------|--------------|--------------|
|                                                  | 1( $\alpha$ ) |              | 1( $\beta$ ) |              | 1( $\gamma$ ) |              |              |              |
|                                                  | Co1           | Co3          | Co1          | Co3          | Co1           | Co2          | Co5          | Co6          |
| Vacant octahedron ( $C_{4v}$ )                   | 6.194         | 3.614        | 6.560        | 5.752        | 5.235         | 3.807        | 3.930        | 4.762        |
| Trigonal bipyramid ( $D_{3h}$ )                  | <b>1.737</b>  | <b>2.460</b> | <b>1.759</b> | <b>1.283</b> | <b>2.042</b>  | <b>2.420</b> | <b>2.334</b> | <b>1.965</b> |
| Spherical square pyramid ( $C_{4v}$ )            | 4.160         | <b>2.006</b> | 4.560        | 4.259        | 4.024         | <b>2.260</b> | <b>2.269</b> | 3.628        |
| Johnson trigonal bipyramid $J_{12}$ ( $D_{3h}$ ) | 2.871         | 3.909        | 2.864        | 2.842        | 3.297         | 3.431        | 3.387        | 3.146        |

**Table S6 c.d.**

| Geometry                                         | CShM         |              |              |              |
|--------------------------------------------------|--------------|--------------|--------------|--------------|
|                                                  | 2            | 1 in 1·2     |              | 2 in 1·2     |
|                                                  | Co1          | Co1          | Co3          | Co6          |
| Vacant octahedron ( $C_{4v}$ )                   | <b>1.574</b> | 5.503        | 6.315        | <b>1.487</b> |
| Trigonal bipyramid ( $D_{3h}$ )                  | 3.455        | <b>1.635</b> | <b>1.833</b> | 3.546        |
| Spherical square pyramid ( $C_{4v}$ )            | <b>1.138</b> | 3.734        | 4.240        | <b>0.966</b> |
| Johnson trigonal bipyramid $J_{12}$ ( $D_{3h}$ ) | 6.189        | 3.152        | 2.960        | 6.192        |

**Table S7.** CShM parameters for six-coordinated Co(II) centers in crystal structures of **1**, **2** and **1·2**

| Geometry                                      | CShM          |              |               |              |              |              |              |              |              |
|-----------------------------------------------|---------------|--------------|---------------|--------------|--------------|--------------|--------------|--------------|--------------|
|                                               | 1( $\alpha$ ) | 1( $\beta$ ) | 1( $\gamma$ ) |              | 2            |              | 1 in 1·2     | 2 in 1·2     |              |
|                                               | Co2           | Co2          | Co3           | Co4          | Co2          | Co3          | Co2          | Co4          | Co5          |
| Pentagonal pyramid ( $C_{5v}$ )               | 18.624        | 18.473       | 19.186        | 19.064       | 25.188       | 16.933       | 17.205       | 16.850       | 24.446       |
| Octahedron ( $O_h$ )                          | <b>3.272</b>  | <b>3.202</b> | <b>3.025</b>  | <b>3.057</b> | <b>1.076</b> | <b>4.937</b> | <b>3.933</b> | <b>4.672</b> | <b>1.058</b> |
| Trigonal prism ( $D_{3h}$ )                   | 9.898         | 9.732        | 8.927         | 8.958        | 12.959       | 7.646        | 9.471        | 8.114        | 13.864       |
| Johnson pentagonal pyramid $J_2$ ( $C_{5v}$ ) | 22.899        | 22.759       | 23.612        | 23.579       | 28.861       | 20.297       | 21.251       | 20.161       | 28.131       |

## Hirshfeld Surface analysis:

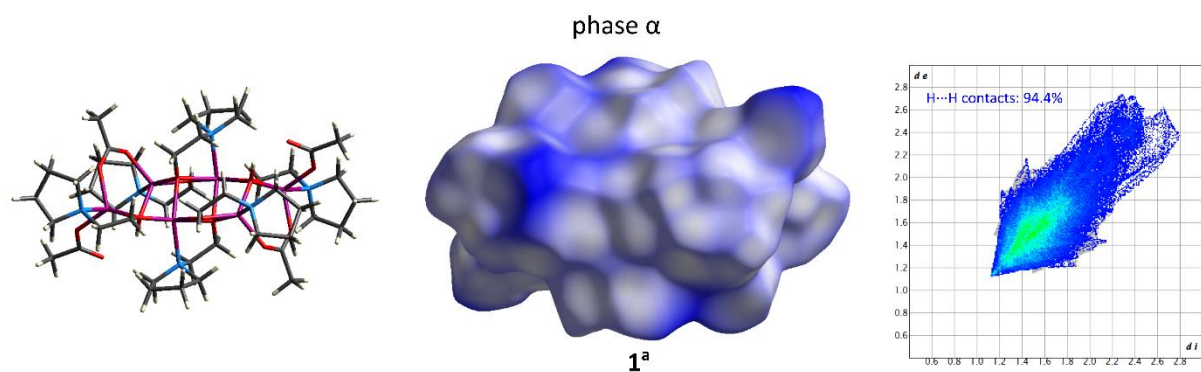

**Figure S13.** Hirshfeld surface (mapped with  $d_{\text{norm}}$ ) and fingerprint plot of cluster **1<sup>a</sup>** in phase  $\alpha$ .

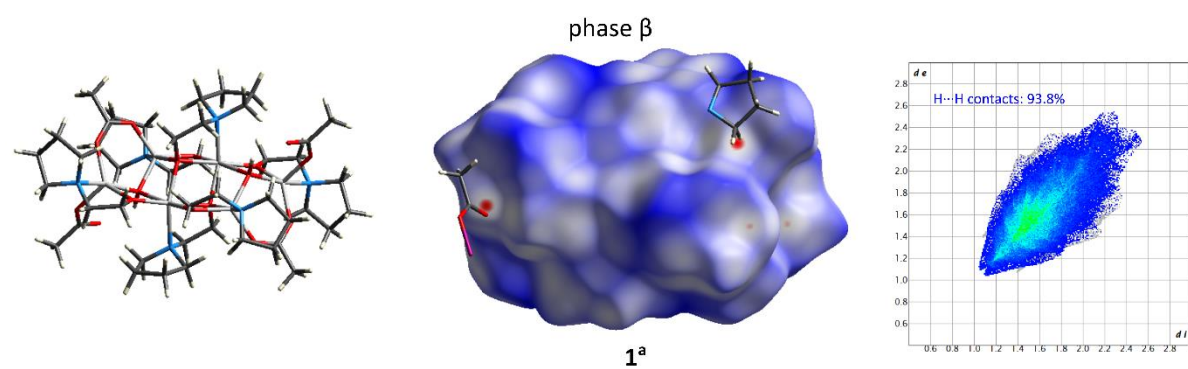

**Figure S14.** Hirshfeld surface (mapped with  $d_{\text{norm}}$ ) and fingerprint plot of cluster **1<sup>a</sup>** in phase  $\beta$ .

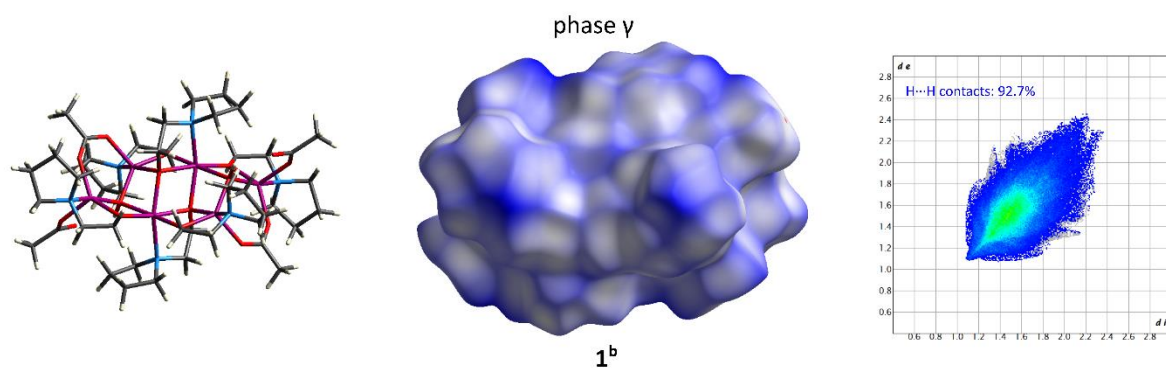

**Figure S15.** Hirshfeld surface (mapped with  $d_{\text{norm}}$ ) and fingerprint plot of cluster **1<sup>b</sup>** in phase  $\gamma$ .

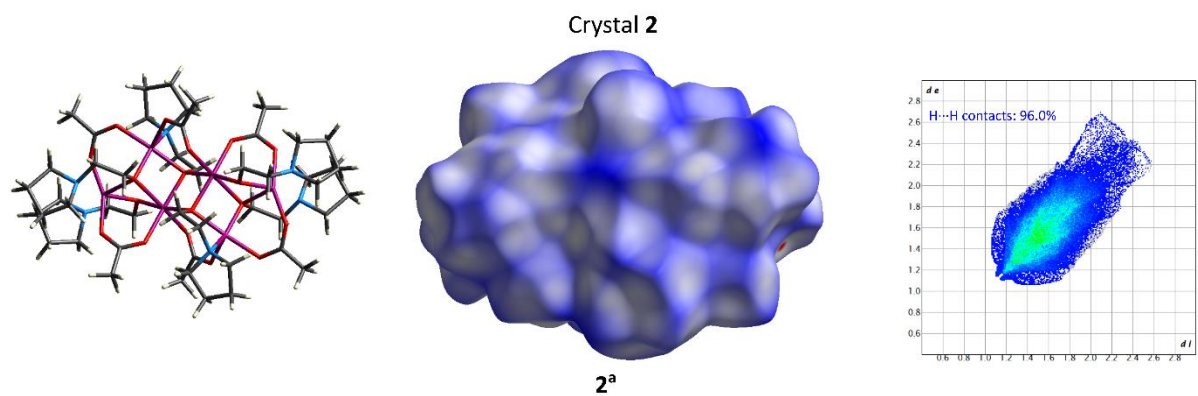

**Figure S16.** Hirshfeld surface (mapped with  $d_{\text{norm}}$ ) and fingerprint plot of cluster  $2^a$ .

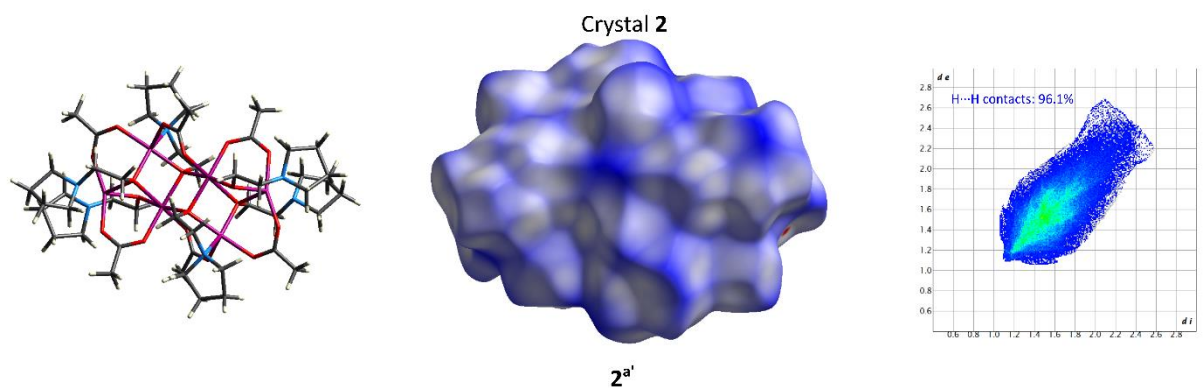

**Figure S17.** Hirshfeld surface (mapped with  $d_{\text{norm}}$ ) and fingerprint plot of cluster  $2^{a'}$ .

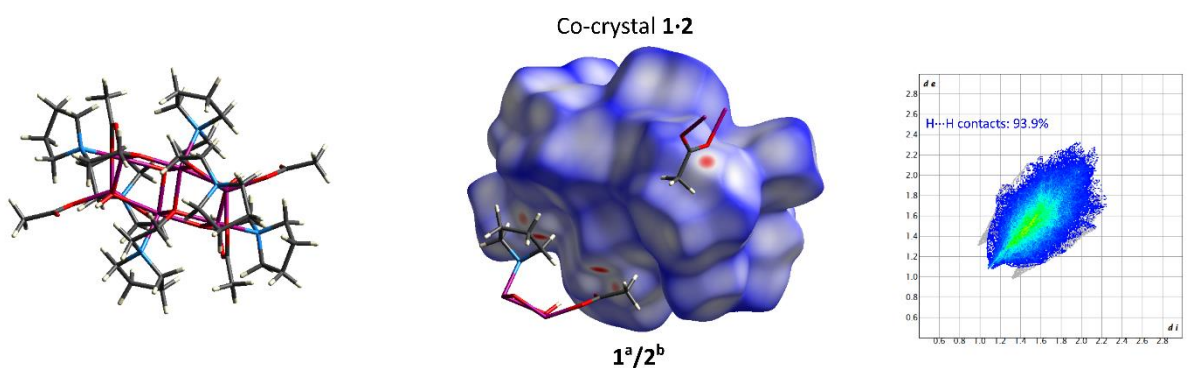

**Figure S18.** Hirshfeld surface (mapped with  $d_{\text{norm}}$ ) and fingerprint plot of cluster  $1^a$  in co-crystal  $1\cdot 2$  (including co-former  $2^b$ ).

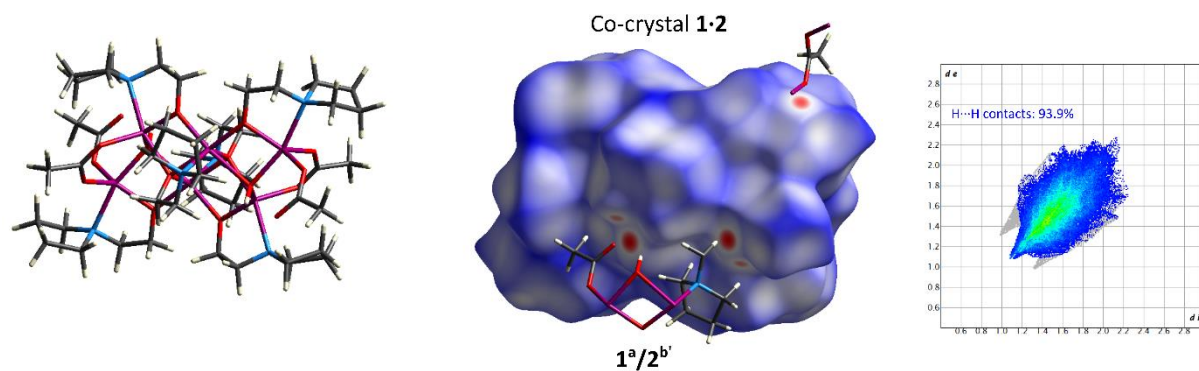

**Figure S19.** Hirshfeld surface (mapped with  $d_{\text{norm}}$ ) and fingerprint plot of cluster  $1^a$  in co-crystal  $1\cdot 2$  (including co-former  $2^b$ ).

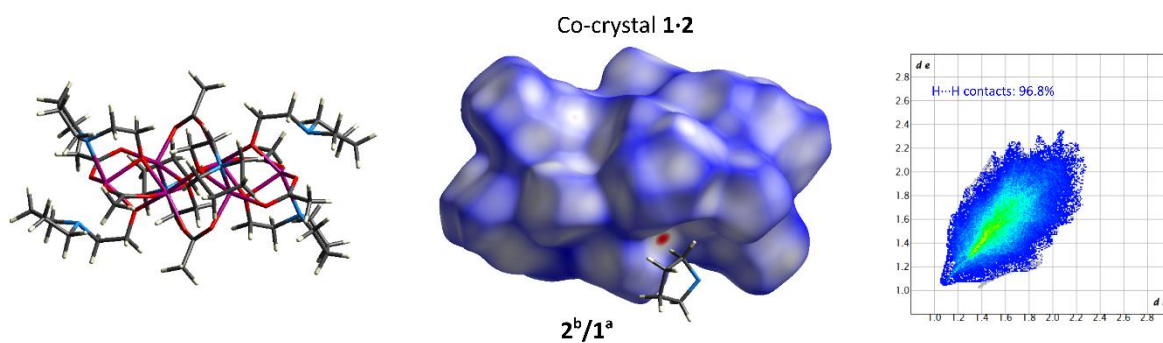

**Figure S20.** Hirshfeld surface (mapped with  $d_{\text{norm}}$ ) and fingerprint plot of cluster  $2^b$  in co-crystal  $1\cdot 2$ .

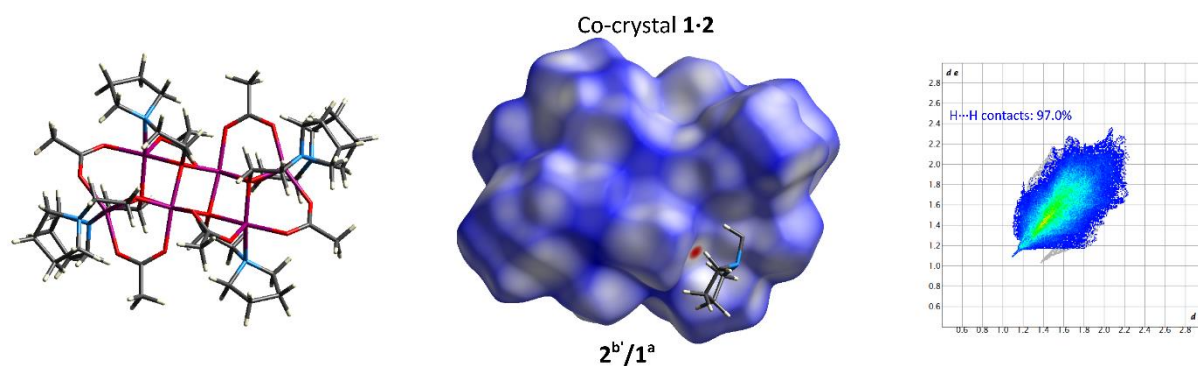

**Figure S21.** Hirshfeld surface (mapped with  $d_{\text{norm}}$ ) and fingerprint plot of cluster  $2^b$  in co-crystal  $1\cdot 2$ .

**Table S8.** Selected Hirshfeld surface (HS) parameters for monocomponent crystals of **1** and **2** and co-crystal **1·2**.

| Molecule                                                         | HS area [Å <sup>2</sup> ] | H...H contacts area [%] | H...O contacts area [%] | <i>d<sub>i</sub></i> [Å] |       |       | <i>d<sub>e</sub></i> [Å] |       |       |
|------------------------------------------------------------------|---------------------------|-------------------------|-------------------------|--------------------------|-------|-------|--------------------------|-------|-------|
|                                                                  |                           |                         |                         | min                      | mean  | max   | min                      | mean  | max   |
| <b>1<sup>a</sup></b> in phase α                                  | 808.13                    | 94.4                    | 4.5                     | 1.126                    | 1.616 | 2.803 | 1.127                    | 1.632 | 2.749 |
| <b>1<sup>a</sup></b> in phase β                                  | 796.83                    | 93.8                    | 5.5                     | 1.048                    | 1.614 | 2.555 | 1.046                    | 1.630 | 2.563 |
| <b>1<sup>b</sup></b> in phase γ                                  | 818.98                    | 92.7                    | 6.3                     | 1.080                    | 1.560 | 2.373 | 1.079                    | 1.575 | 2.479 |
| <b>2<sup>a</sup></b> in <b>2</b>                                 | 819.24                    | 96.0                    | 3.6                     | 1.062                    | 1.581 | 2.593 | 1.061                    | 1.594 | 2.703 |
| <b>2<sup>a'</sup></b> in <b>2</b>                                | 824.43                    | 96.1                    | 3.5                     | 1.061                    | 1.576 | 2.583 | 1.061                    | 1.590 | 2.701 |
| <b>1<sup>a</sup></b> (with <b>2<sup>b</sup></b> ) in <b>1·2</b>  | 800.24                    | 93.9                    | 5.6                     | 0.995                    | 1.565 | 2.293 | 0.995                    | 1.579 | 2.349 |
| <b>1<sup>a</sup></b> (with <b>2<sup>b'</sup></b> ) in <b>1·2</b> | 797.46                    | 93.9                    | 5.5                     | 0.995                    | 1.561 | 2.293 | 0.995                    | 1.574 | 2.316 |
| <b>2<sup>b</sup></b> in <b>1·2</b>                               | 844.35                    | 96.8                    | 3.0                     | 1.055                    | 1.586 | 2.298 | 1.036                    | 1.604 | 2.367 |
| <b>2<sup>b'</sup></b> in <b>1·2</b>                              | 845.17                    | 97.0                    | 2.7                     | 1.096                    | 1.579 | 2.271 | 1.035                    | 1.596 | 2.367 |

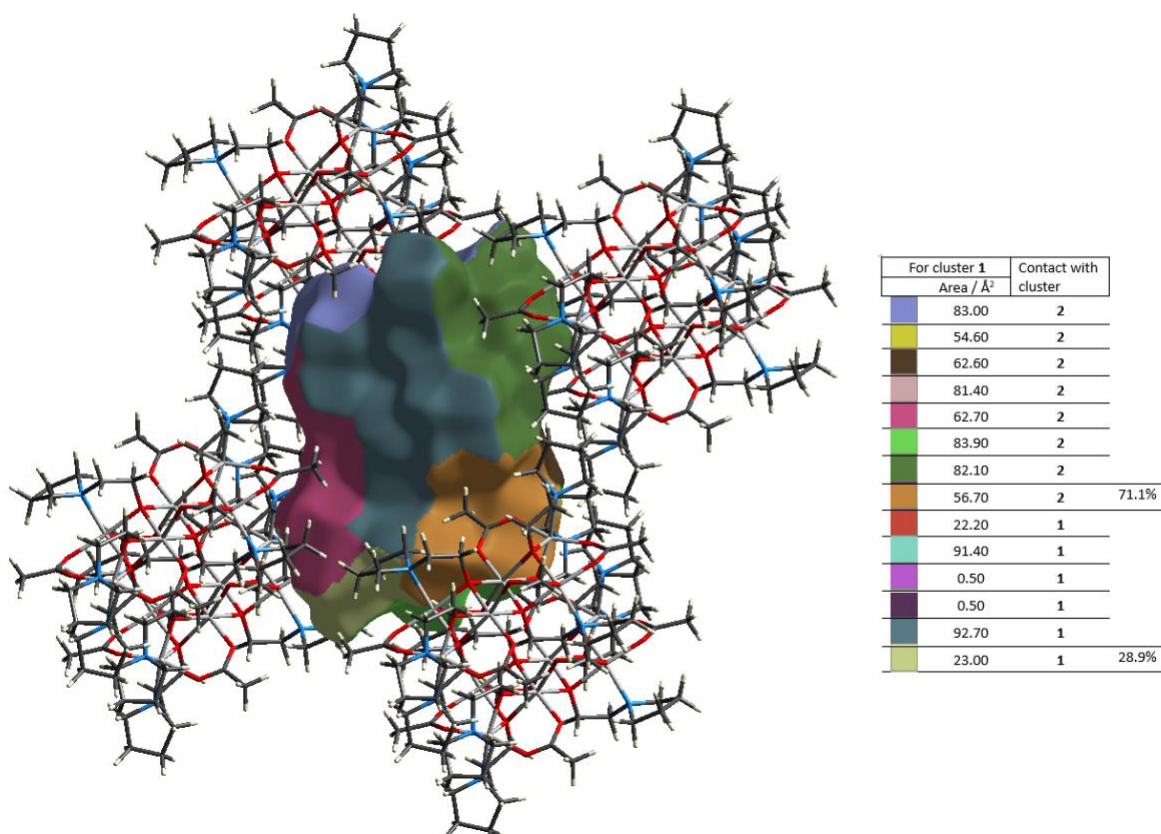

**Figure S22.** Analysis of HS contacts of cluster **1** in co-crystal **1·2**.



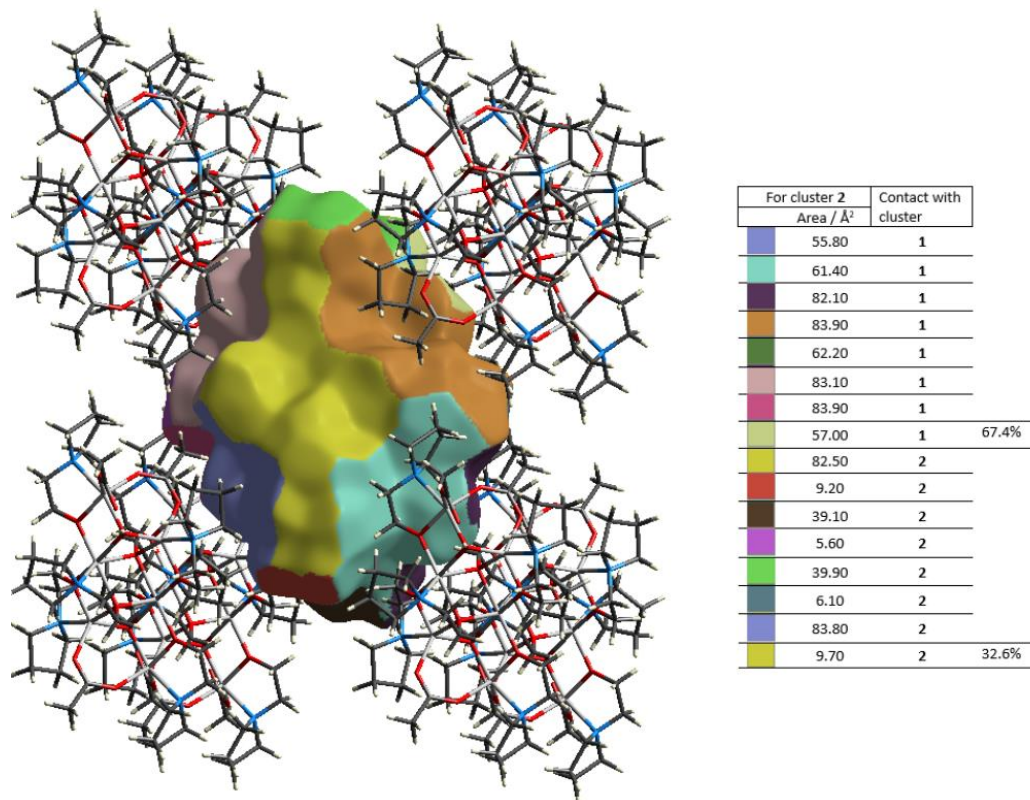

**Figure S23.** Analysis of HS contacts of cluster 1 in co-crystal 1·2.

---

**References:**

- 1 R. Kuhlman, G. L. Schimek and J. W. Kolis, *Inorg. Chem.*, 1999, **38**, 194–196.
- 2 G. Zhang, J. Lin, D. Guo, S. Yao and Y. Tian, *Zeitschrift für Anorg. und Allg. Chemie*, 2010, **636**, 1401–1404.
- 3 H. Zabrodsky, S. Peleg and D. Avnir, *J. Am. Chem. Soc.*, 1992, **114**, 7843–7851.
- 4 M. Llunell, D. Casanova, J. Cirera, P. Alemany and S. Alvarez, 2013, Version 2.1.
